## CORRECTION

# Correction: Nursing staff's attitudes towards the prevention of adverse events among hospitalized people with dementia: Protocol of qualitative systematic review and evidence synthesis

Lucía Catalán, Anne Margriet Pot, Amy Pepper, Karen Harrison Dening, Déborah Oliveira

The following information is missing from the Funding statement: This work is supported by the Virrectoría de Investigación y Doctorados de la Universidad San Sebastián - Fondo USS-FIN-24-APCS-24.

## Reference

1. Catalán L, Pot AM, Pepper A, Harrison Dening K, Oliveira D. Nursing staff's attitudes towards the prevention of adverse events among hospitalized people with dementia: protocol of qualitative systematic review and evidence synthesis. PLoS One. 2024;19(9): e0301651. <https://doi.org/10.1371/journal.pone.0301651> PMID: [39250502](https://pubmed.ncbi.nlm.nih.gov/39250502/)

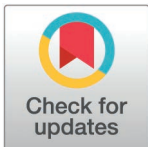

## OPEN ACCESS

**Citation:** Catalán L, Pot AM, Pepper A, Dening KH, Oliveira D (2025) Correction: Nursing staff's attitudes towards the prevention of adverse events among hospitalized people with dementia: Protocol of qualitative systematic review and evidence synthesis. PLoS ONE 20(4): e0321865. <https://doi.org/10.1371/journal.pone.0321865>

**Published:** April 2, 2025

**Copyright:** © 2025 Catalán et al. This is an open access article distributed under the terms of the [Creative Commons Attribution License](https://creativecommons.org/licenses/by/4.0/), which permits unrestricted use, distribution, and reproduction in any medium, provided the original author and source are credited.
